# Supplementary material for: A Systems-Pharmacology Analysis of Herbal Medicines Used in Health Improvement Treatment: Predicting Potential New Drugs and Targets
Source: Evid Based Complement Alternat Med. 2013 Nov 28;2013:938764. doi: 10.1155/2013/938764 (PMC3863530; doi:10.1155/2013/938764)
Supplement: Supplementary file 1 — Table S1: This table contains the information of all compounds belong to 8 qi-enriching herbs. It covers qi-enriching TCM name, compounds name in each TCM and their value of Oral Bioavailability and Drug-likeness. Table S2: This table contains the information of all compounds belong to 4 blood-tonifying herbs. It covers blood-tonifying TCM name, compounds name in each TCM and their value of Oral Bioavailability and Drug-likeness. [file 938764.f1.xlsx]

## Sheet: Sheet1
Table S1：The information of all compounds belong to qi-enriching herbs
TCM name	Compounds name	Oral Bioavailability	Drug-likeness
Rhizoma Atractylodis Macrocephalae	1,7,7-three methyl double loop [2.2.1] g-2-alcohol	86.9841	0.05275
Rhizoma Atractylodis Macrocephalae	2,2-dimethyl-3-methylene-	34.9792	0.039017
Rhizoma Atractylodis Macrocephalae	12-senecioyl-2E,8E,10E-atractylentriol	62.3965	0.22294
Rhizoma Atractylodis Macrocephalae	14-acetyl-12-senecioyl-2E,8E,10E-atractylentriol	60.3129	0.30534
Rhizoma Atractylodis Macrocephalae	14-acetyl-12-senecioyl-2E,8Z,10E-atractylentriol	63.3709	0.29956
Rhizoma Atractylodis Macrocephalae	d-limonene	39.841	0.02231
Rhizoma Atractylodis Macrocephalae	α-humulene	22.9768	0.061124
Rhizoma Atractylodis Macrocephalae	α-Longipinene	53.2611	0.12477
Rhizoma Atractylodis Macrocephalae	α-spinasterol	10.3925	0.75173
Rhizoma Atractylodis Macrocephalae	α-curcumene	22.7264	0.055937
Rhizoma Atractylodis Macrocephalae	α-Amyrin	39.5121	0.7629
Rhizoma Atractylodis Macrocephalae	β-humulene	26.8664	0.061239
Rhizoma Atractylodis Macrocephalae	2-methyl-1-2-ee propylene-1-alcohol	75.1035	0.028357
Rhizoma Atractylodis Macrocephalae	β-sesquiphellandrene	19.8609	0.055576
Rhizoma Atractylodis Macrocephalae	β-Eudesmol	26.0916	0.095471
Rhizoma Atractylodis Macrocephalae	β-sitosterol	36.2285	0.78288
Rhizoma Atractylodis Macrocephalae	β-elemol	19.0331	0.072534
Rhizoma Atractylodis Macrocephalae	β- Selinene	24.3882	0.081081
Rhizoma Atractylodis Macrocephalae	β-Caryophyllene	29.7023	0.089893
Rhizoma Atractylodis Macrocephalae	Guaiene	24.7338	0.071856
Rhizoma Atractylodis Macrocephalae	γ-elemene	23.7859	0.060288
Rhizoma Atractylodis Macrocephalae	acridine	33.7124	0.097884
Rhizoma Atractylodis Macrocephalae	eudesmol	16.2454	0.09548
Rhizoma Atractylodis Macrocephalae	2-methyl-5-(1-methyl vinyl) cyclohexano	52.395	0.029275
Rhizoma Atractylodis Macrocephalae	Scopoletin B	27.7735	0.076154
Rhizoma Atractylodis Macrocephalae	atractylenolideI	37.3654	0.1488
Rhizoma Atractylodis Macrocephalae	atractylenolideII	47.504	0.14799
Rhizoma Atractylodis Macrocephalae	atractylenolideIII	68.113	0.17145
Rhizoma Atractylodis Macrocephalae	atractylone	41.616	0.12714
Rhizoma Atractylodis Macrocephalae	scopoletin	27.7735	0.076154
Rhizoma Atractylodis Macrocephalae	juniper camphor	33.2966	0.096606
Rhizoma Atractylodis Macrocephalae	Furanodiene	54.1278	0.095287
Rhizoma Atractylodis Macrocephalae	3β-acetoxyatractylone	53.4798	0.21905
Rhizoma Atractylodis Macrocephalae	BPBG	58.479	0.24531
Rhizoma Atractylodis Macrocephalae	hinesol	38.5922	0.087072
Rhizoma Atractylodis Macrocephalae	selina-4(14),7(11)-dien-8-one	32.3229	0.095813
Rhizoma Atractylodis Macrocephalae	[selina-4(14),7(11)-dien-8-one]	32.4407	0.095813
Rhizoma Atractylodis Macrocephalae	biatractylolide	17.4462	0.81468
Rhizoma Atractylodis Macrocephalae	ATRACTYLODES MACROCEPHALA	14.5979	0.81472
Rhizoma Atractylodis Macrocephalae	(+)-AROMADENDRENE	53.4614	0.10414
Rhizoma Atractylodis Macrocephalae	Palmitic acid	19.2966	0.098573
Rhizoma Atractylodis Macrocephalae	ethyl-4,4-dimethyl-3-oxovalerate	40.5219	0.03061
Rhizoma Atractylodis Macrocephalae	Alloaeromadendrene	50.7832	0.10418
Rhizoma Atractylodis Macrocephalae	Acoradiene	39.8961	0.072957
Rhizoma Atractylodis Macrocephalae	atractylenolideⅣ	79.8804	0.28074
Rhizoma Atractylodis Macrocephalae	atractylenolideⅥ	23.995	0.081567
Rhizoma Atractylodis Macrocephalae	atractylenolideⅤ	62.3304	0.19512
Rhizoma Atractylodis Macrocephalae	atractylenolideⅦ	15.7464	0.1433
Rhizoma Atractylodis Macrocephalae	isoasterolide A	21.9543	0.14792
Rhizoma Atractylodis Macrocephalae	atractylenolactam	55.1861	0.17044
Rhizoma Atractylodis Macrocephalae	8β-methoxyasterolid	60.5243	0.19003
Rhizoma Atractylodis Macrocephalae	8β-ethoxy asterolid	59.1412	0.21074
Rhizoma Atractylodis Macrocephalae	scopoletin 6-methoxy-7-hydroxycoumarin	27.7735	0.076154
Rhizoma Atractylodis Macrocephalae	Atractyloside A	41.062	0.56988
Rhizoma Atractylodis Macrocephalae	Atractyloside B	30.2601	0.57018
Rhizoma Atractylodis Macrocephalae	icarisid F2	6.41455	0.47121
Rhizoma Atractylodis Macrocephalae	icarisid D1	5.70223	0.52045
Rhizoma Atractylodis Macrocephalae	ELEUTHEROSIDE B	47.6146	0.32497
Rhizoma Atractylodis Macrocephalae	Scutellarein 6-0-glucoside	29.0456	0.76944
Rhizoma Atractylodis Macrocephalae	4H-1-Benzopyran-4-one	31.2191	0.043794
Rhizoma Atractylodis Macrocephalae	7-hydroxyl-6 7-hydroxy-2 H-color ene-2-ketone	27.1894	0.076154
Rhizoma Atractylodis Macrocephalae	6-(β-D-glucopyranosyloxy)-5-hydroxy-7-methoxy-2-phenyl	32.0686	0.76219
Rhizoma Atractylodis Macrocephalae	4H-1-Benzopyran-4-one，8-(β-D-glucopyranosyloxy)-5，7-dihydroxy-2-(4-hydroxyphenyl)	29.8979	0.79807
Rhizoma Atractylodis Macrocephalae	Stereolensin	2.95572	0.58173
Rhizoma Atractylodis Macrocephalae	2-Propenoic acid，3-(3，4-dihydroxy-phenyl)-，4-(6-β-D-glucopyranosyl-5，7-dihydroxy-4-OXO- 4H-l-bemopyran-2-y1)-2-hydroxyphenyl ester，(2E)	50.3489	0.11056
Rhizoma Atractylodis Macrocephalae	8β-ethoxy atractylenolide Ⅲ	35.9509	0.21079
Codonopsis pilosula	1,22-Docosanediol	12.5927	0.26318
Codonopsis pilosula	13-Methyl pentadecanoic acid	24.1374	0.096135
Codonopsis pilosula	heptanoic acid	13.6286	0.012177
Codonopsis pilosula	hexanoic acid	9.80889	0.0089966
Codonopsis pilosula	linoleic acid	41.9044	0.14425
Codonopsis pilosula	luteolin-5-O-β-D-glucopyranoside	7.28986	0.78895
Codonopsis pilosula	luteolin-7-O-β-D-glucopyranoside	7.70121	0.78005
Codonopsis pilosula	luteolin	51.0999	0.24552
Codonopsis pilosula	methyl palmitate	18.0876	0.1158
Codonopsis pilosula	n-Nonanol	33.1535	0.014845
Codonopsis pilosula	o-(o-methoxyphenoxy)phenol	50.7505	0.089745
Codonopsis pilosula	octadecane	8.5811	0.090264
Codonopsis pilosula	14-Methyl hexadecanoic acid	23.1249	0.11429
Codonopsis pilosula	pelargonic acid	44.0352	0.021183
Codonopsis pilosula	perlolyrine	62.2343	0.27472
Codonopsis pilosula	stigmast-7-enol	37.4231	0.75022
Codonopsis pilosula	stigmasterol-β-glucoside	43.8299	0.62642
Codonopsis pilosula	syringaldehyde	35.0558	0.048058
Codonopsis pilosula	syringin ko	43.1221	0.32495
Codonopsis pilosula	tangshenoside I	23.5755	0.47387
Codonopsis pilosula	tangshenoside III	8.74657	0.46126
Codonopsis pilosula	tangshenoside IV	4.28252	0.1469
Codonopsis pilosula	taraxerol acetate	9.74844	0.7438
Codonopsis pilosula	2,4-nonadienal	24.7338	0.015813
Codonopsis pilosula	taraxerol	38.4025	0.76665
Codonopsis pilosula	tectoridin	12.0873	0.78924
Codonopsis pilosula	tectoridin_qt	26.4478	0.26822
Codonopsis pilosula	tert-butylbenzene	53.0554	0.024819
Codonopsis pilosula	α-bulnesene	28.9314	0.072101
Codonopsis pilosula	α-curcumene( R-)	20.6609	0.05606
Codonopsis pilosula	α-curcumene( S-)	24.0691	0.05606
Codonopsis pilosula	α-spinasterol	42.9794	0.75519
Codonopsis pilosula	1,2,3,4-TETRAHYDRO-BETA-CARBOLINE-1-CARBOXYLIC ACID	47.1476	0.13139
Codonopsis pilosula	2,6-Nonadienol	23.7717	0.015505
Codonopsis pilosula	2-furoic acid	32.7265	0.015247
Codonopsis pilosula	20-Hexadecanoylingenol	28.204	0.68307
Codonopsis pilosula	3-Methylcarbazole	20.1391	0.093157
Codonopsis pilosula	3-beta-Hydroxymethyllenetanshiquinone	32.5514	0.40895
Codonopsis pilosula	4-Methylsulfinyl butyl isothiocyanate	56.9692	0.015282
Codonopsis pilosula	4-Phenylbicyclo[2,2,2]octan-1-ol	25.0674	0.092113
Codonopsis pilosula	1-(5-hydroxymethyl-2-furyl)-9H-pyrido[3,4-b]indole	39.1336	0.27486
Codonopsis pilosula	5-Methoxy-3-(2-phenyl-E-E-ethenyl)-2,4-bis(4-hydroxybenzyl)phenol	1.02841	0.65922
Codonopsis pilosula	5-hydroxy-2-pyridine methanol	46.1243	0.019986
Codonopsis pilosula	5-hydroxymethylfurfural	71.8323	0.019425
Codonopsis pilosula	5-methoxymethyl-2-furaldehyde	28.7131	0.023505
Codonopsis pilosula	5alpha-Stigmastan-3,6-dione	33.1154	0.79021
Codonopsis pilosula	6,6'-Dimethoxygossypol	8.93443	0.8615
Codonopsis pilosula	7-(beta-Xylosyl)cephalomannine	38.3275	0.17466
Codonopsis pilosula	7-Methoxy-2-methyl isoflavone	34.9824	0.19946
Codonopsis pilosula	7alpha-L-Rhamnosyl-6-methoxylutcolin	9.05739	0.78681
Codonopsis pilosula	8alpha-Methoxyfuranodiene	51.9733	0.12909
Codonopsis pilosula	1-Heptadecanol	12.9664	0.09373
Codonopsis pilosula	Atractylenolide II	45.0236	0.14799
Codonopsis pilosula	Atractylenolide III	68.7702	0.18145
Codonopsis pilosula	Azelaic acid	17.6364	0.041324
Codonopsis pilosula	Butyl-cyclohexane	35.6837	0.019473
Codonopsis pilosula	Caprylic acid	30.6704	0.016205
Codonopsis pilosula	Capsaicin (e)	10.3103	0.19565
Codonopsis pilosula	Chrysanthemaxanthin	38.724	0.58354
Codonopsis pilosula	Codonopsine	45.8342	0.13052
Codonopsis pilosula	Coelogin	22.3311	0.41533
Codonopsis pilosula	Daturilin	50.3651	0.76801
Codonopsis pilosula	1-Methyl naphthalene	38.9493	0.041295
Codonopsis pilosula	Diisocapryl phthalate	43.5933	0.39259
Codonopsis pilosula	Dodecanoic acid	23.5879	0.043606
Codonopsis pilosula	Encecalin	43.7059	0.11238
Codonopsis pilosula	Ethyl-p-digallate	2.26907	0.3128
Codonopsis pilosula	Fritillaziebinol	15.0114	0.3385
Codonopsis pilosula	Frutinone A	60.7379	0.34184
Codonopsis pilosula	Furanodiene	46.1052	0.095298
Codonopsis pilosula	Glycitein	50.4789	0.23826
Codonopsis pilosula	Guaijaverin ko	38.8562	0.70268
Codonopsis pilosula	Heneicosane	8.41291	0.15355
Codonopsis pilosula	1-Pentadecene	12.8914	0.049619
Codonopsis pilosula	Heneicosanic acid	16.1425	0.22694
Codonopsis pilosula	Hentriacontane	8.06806	0.50407
Codonopsis pilosula	Hexadecanoic acid	19.2966	0.098535
Codonopsis pilosula	Hexyl beta-D-glucopyranoside	15.5991	0.10565
Codonopsis pilosula	Hexyl-beta-D-glucopyranosyl-(1-2)-beta-D-glucopyranoside	22.0562	0.43713
Codonopsis pilosula	Lauric aldehyde	21.5184	0.033475
Codonopsis pilosula	Methionine sulfoxide	83.518	0.018586
Codonopsis pilosula	1-Peroxyferolide	18.8153	0.096347
Codonopsis pilosula	Methyl Pentadecanoate	41.9344	0.16725
Codonopsis pilosula	Methyl linoleate	21.7967	0.079546
Codonopsis pilosula	Methyl myristate	17.3836	0.35054
Codonopsis pilosula	Methyl stearate	16.8031	0.16334
Codonopsis pilosula	Myristicin	29.9647	0.067662
Codonopsis pilosula	Nicotinic acid	20.1707	0.020169
Codonopsis pilosula	Nonadecane	5.26994	0.10871
Codonopsis pilosula	Nonadecanoic acid	17.2084	0.16641
Codonopsis pilosula	Norharman	20.2568	0.080536
Codonopsis pilosula	Octadecanoic acid	17.8254	0.14084
Codonopsis pilosula	11,14-eicosadienoic acid methyl ester	12.6573	0.11373
Codonopsis pilosula	Octadecanol	17.9755	0.016187
Codonopsis pilosula	Octanoic acid	20.1846	0.080812
Codonopsis pilosula	Pentadecanoic acid	39.6671	0.22923
Codonopsis pilosula	Ricinine	26.0591	0.041076
Codonopsis pilosula	Spinoside A	39.9669	0.40288
Codonopsis pilosula	Stigmasta-5,22-dien-3-one	45.4046	0.76174
Codonopsis pilosula	Stigmasterin	43.8299	0.75758
Codonopsis pilosula	Stigmasterol-beta-D-glucoside	43.8299	0.6299
Codonopsis pilosula	Stigmasteryl ferulate	24.5296	0.55475
Codonopsis pilosula	Tangshenoside II	51.7226	0.31746
Codonopsis pilosula	Taraxerone	41.3124	0.77161
Codonopsis pilosula	Tartaric acid	66.896	0.024851
Codonopsis pilosula	Tetradecanoic Acid	21.1812	0.066771
Codonopsis pilosula	11-Hydroxyrankinidine	40.0028	0.66203
Codonopsis pilosula	alpha-Spinasterol-beta-D-glucoside	42.9794	0.62652
Codonopsis pilosula	alpha-Stigmasta-7,22-dien-3-one	11.4248	0.76418
Codonopsis pilosula	alpha-pinene	46.1998	0.052565
Codonopsis pilosula	apigenin	67.8656	0.21306
Codonopsis pilosula	belta-bulnesene	28.9314	0.072101
Codonopsis pilosula	beta-Curcumene	4.47791	0.055442
Codonopsis pilosula	beta-Pinene	44.7013	0.052595
Codonopsis pilosula	borneol	88.0278	0.052748
Codonopsis pilosula	choline	0.455207	0.0087197
Codonopsis pilosula	codopiloic acid	57.499	0.020718
Codonopsis pilosula	12-O-Nicotinoylisolineolone	20.6862	0.83406
Codonopsis pilosula	delta22-Stigmasterol	7.04101	0.75537
Codonopsis pilosula	delta7-Stigmastenone-3	9.68802	0.75893
Codonopsis pilosula	delta7-stigmastenol-belta-D-glucopyranoside	25.3221	0.6187
Codonopsis pilosula	dl-Syringaresinol	84.3082	0.72255
Codonopsis pilosula	docosane	8.36569	0.1802
Codonopsis pilosula	dodecane	15.3624	0.024004
Codonopsis pilosula	ethyl-alpha-D-fructofuranoside	46.2477	0.058604
Codonopsis pilosula	ethyl-β-D-fructofuranoside	33.8439	0.14512
Codonopsis pilosula	friedelin	10.3091	0.75894
Codonopsis pilosula	heptadecane	8.64247	0.074321
Radix Astragali	3,9-di-O-methylnissolin	38.5771	0.47573
Radix Astragali	3-hydroxy-2-methylpyridine	62.4727	0.015684
Radix Astragali	5,4'-dihydroxy-3,7-dimethoxyflavone kumatakenin	51.1564	0.29148
Radix Astragali	4'-O-beta-Glucopyranosyl-5-O-Methylvisamminol	19.325	0.80846
Radix Astragali	5'-hydroxyiso-muronulatol-2',5'-di-O-glucoside	81.7184	0.69251
Radix Astragali	7,2'-dihydroxy-3',4'-dimethoxyisoflavone-7-O-β-D-glucoside	64.2495	0.85522
Radix Astragali	7-O-methylisomucronulatol	74.6861	0.29792
Radix Astragali	9,10-dimethoxypterocarpan-3-O-β-D-glucoside	64.2555	0.9243
Radix Astragali	13-hydroxy-9,11-octadecadienoic acid	35.5967	0.16728
Radix Astragali	D(-)-Arabinose	1.87148	0.022118
Radix Astragali	α-D-Galacturonic acid monohydrate	29.7523	0.044648
Radix Astragali	D-Glucuronic acid	3.35196	0.044666
Radix Astragali	Isoferulic acid	91.027	0.058159
Radix Astragali	L-(-)-Fucose	42.5109	0.027276
Radix Astragali	dimethyl-4,4'-dimethoxy-5,6,5',6'-mdimethylene-dioxybiphenyl-2,2'-dicarboxylate	31.0978	0.66553
Radix Astragali	sitosterol	36.2285	0.78288
Radix Astragali	γ-aminobutyric acid	24.0891	0.0070086
Radix Astragali	ferulic acid	54.9655	0.058005
Radix Astragali	Betulinic acid	16.7009	0.7759
Radix Astragali	β-sitosterol-3-O-β-D-glucopyranoside daucosterol	36.9139	0.62681
Radix Astragali	formononetin	19.4411	0.18694
Radix Astragali	formononetin-7-glucoside	69.6739	0.7756
Radix Astragali	soyasaponinI	14.5932	0.051908
Radix Astragali	choline	0.474665	0.0087188
Radix Astragali	canavanine	54.9516	0.033506
Radix Astragali	syringaresinol	3.29171	0.72244
Radix Astragali	Phenyl of p-anisaldehyde acrylic	45.9822	0.039073
Radix Astragali	isoflavanone	51.7702	0.13389
Radix Astragali	behenic acid docosanoic acid	15.6884	0.26054
Radix Astragali	riboflavin	61.8671	0.4997
Radix Astragali	alexandrin	36.9139	0.62697
Radix Astragali	Quercetin	8.82267	0.27525
Radix Astragali	astragalosideI	46.7929	0.10777
Radix Astragali	astragalosideII	38.1865	0.12588
Radix Astragali	astragalosideⅢ	31.8288	0.095752
Radix Astragali	astragalosideⅣ	17.4715	0.15118
Radix Astragali	AstragalosideIV	17.7415	0.15123
Radix Astragali	mucronulatol-7-O-glucoside	76.1974	0.85623
Radix Astragali	Astragaloside I	44.4427	0.10777
Radix Astragali	Astragaloside II	37.3775	0.12589
Radix Astragali	astrachrysoside A	17.7832	0.10329
Radix Astragali	arginine	47.642	0.031878
Radix Astragali	Caffeic acid	54.9705	0.050036
Radix Astragali	Rutin	10.416	0.68283
Radix Astragali	lariciresinol	5.52619	0.37941
Radix Astragali	Chlorogenic acid	11.9327	0.32612
Radix Astragali	Ononin	69.6739	0.77561
Radix Astragali	calycosin	47.7518	0.24278
Radix Astragali	calycosin-7-O-glucoside	25.6738	0.81027
Radix Astragali	astrasieversianin XV	17.7832	0.066847
Radix Astragali	astramembranninI	17.7386	0.15122
Radix Astragali	xylose	51.0764	0.022107
Radix Astragali	nicotinic acid	47.6453	0.020168
Radix Astragali	proline	77.5586	0.014161
Radix Astragali	Kaempferol	41.8822	0.24066
Radix Astragali	docosanoic acid behenic acid	15.6884	0.26054
Radix Astragali	rhamnocitrin-3-O-glucoside	11.4383	0.76403
Radix Astragali	asernestioside A	15.3289	0.032981
Radix Astragali	asernestioside B	13.7294	0.030286
Radix Astragali	asparagine	83.9576	0.016451
Radix Astragali	asparamide	97.4406	0.016459
Radix Astragali	betaine	40.9553	0.012606
Radix Astragali	vanillic acid	33.5004	0.040931
Radix Astragali	coumarin	29.1676	0.043014
Radix Astragali	linolenic acid	45.0091	0.14709
Radix Astragali	linoleic acid	41.9044	0.14431
Radix Astragali	folic acid	68.9604	0.7057
Radix Astragali	acetylastragaloside I	43.5382	0.094201
Radix Astragali	Isoliquiritigenin	87.5085	0.14769
Radix Astragali	isoquercitrin isoquercetrin	48.6799	0.76904
Radix Astragali	Isorhamnetin	51.6726	0.306
Radix Astragali	isomucronulatol	67.6675	0.26479
Radix Astragali	isomucronulatol-7,2'-di-O-glucosiole	67.2001	0.62065
Radix Astragali	biochain B	68.8494	0.21202
Radix Astragali	lupeol	12.2546	0.77724
Radix Astragali	lupenone	11.6568	0.78096
Radix Astragali	Red sandalwood ene	67.6145	0.47945
Radix Astragali	Palmitic acid	19.2966	0.098573
Radix Astragali	1,8-dihydroxy-3-methoxy-6-methylxantone	44.7239	0.2386
Radix Astragali	(4 R*,5 S*,6 E,8 Z)-ethyl-4-((E)-but-1-enyl)-5-hydroxypentdeca-6,8-dienoate	43.0894	0.19613
Radix Astragali	euxanthone	46.5725	0.16338
Radix Astragali	chrysophanol	22.7217	0.2094
Radix Astragali	physcion	22.684	0.26655
Radix Astragali	aloeemodin	20.0678	0.24089
Radix Astragali	emodin	24.222	0.23916
Radix Astragali	obtusifolin	19.1021	0.26598
Radix Astragali	stigmasterol	43.8299	0.75781
Radix Astragali	friedelin	10.2747	0.75889
Radix Astragali	lupeol	17.6954	0.77714
Radix Astragali	oxytrofalcatins A	85.8776	0.14544
Radix Astragali	oxytrofalcatins B	85.3867	0.17185
Radix Astragali	oxytrofalcatins C	67.6301	0.19263
Radix Astragali	oxytrofalcatins D	61.3197	0.2227
Radix Astragali	oxytrofalcatins E	77.3482	0.31332
Radix Astragali	oxytrofalcatins F	73.6021	0.17102
Radix Astragali	7,3',5'-trihydroxyflavanone	56.2911	0.21113
Radix Astragali	5,7,3',5'-tetrahydroxyflavanone	56.8512	0.24238
Radix Astragali	7,4'-dihydroxy-3'-methoxyflavanone	51.0658	0.23808
Radix Astragali	2',4',3,4-tetrahydroxychalcone	1.37429	0.17386
Radix Astragali	2',4',4-trihydroxy- 3-methoxychalcone	2.05248	0.19512
Radix Astragali	sulfuretin	36.0836	0.21338
Radix Astragali	farnisin	20.3423	0.24009
Radix Astragali	diosmetin	65.6962	0.2744
Radix Astragali	7,3',4'-trihydroxyflavone	29.5298	0.21403
Radix Astragali	luteolin	48.5523	0.27159
Radix Astragali	lupanine	58.0243	0.24078
Radix Astragali	7,3'-dihydroxy-4'-methoxyflavone-7-O- b-glucopyranoside	44.09	0.80294
Radix Astragali	(E)-eicos-14-enoic acid	30.7029	0.19798
Radix Astragali	1-hydroxy-7-methoxy-3-methylanthraquinone	20.6795	0.23527
Radix Astragali	1, 7- dihydroxy-3-methoxyxanthone	94.1131	0.21336
Radix Astragali	1,5-dihydroxy-3-methoxy-7-methylanthraquinone	88.6666	0.26656
Radix Astragali	1,2,8-trihydroxy-6,7-dimethoxyanthraquinone	75.4084	0.33825
Radix Astragali	1,3,6-trihydroxy-8-methylxanthone	100.099	0.21366
Radix Astragali	(-)-acetoxy-9,10-dimethyl-1,5-octacosanolide	22.6022	0.56993
Radix Astragali	(-)- N -benzoyl-2-hydroxy-2-phenylethylamine	67.9892	0.11566
Radix Astragali	(+)- N-benzoyl-2-hydroxy-2-phenylethylamine	75.8193	0.11571
Radix Astragali	N-formyl- p-hydroxybenzamide	53.9821	0.039865
Radix Astragali	4-hydroxybenzamide	28.5496	0.025956
Ginseng	(+)-Maalioxide	55.9268	0.127
Ginseng	1,2-Benzenedicarboxylic acid diisooctyl ester	43.5933	0.39115
Ginseng	1-Heptadecanol	12.9664	0.093861
Ginseng	1-Hexadecyne	3.94379	0.063045
Ginseng	1-Tetradecanol	14.1899	0.051218
Ginseng	12-O-Nicotinoylisolineolone	14.1247	0.83408
Ginseng	13-tetradecen-1-ol acetate	36.7604	0.10041
Ginseng	16-Oxoseratenediol	15.1008	0.75175
Ginseng	2,2-Dimethylbutane	37.8094	0.006562
Ginseng	2,3,4-Trimethyldecane	16.1477	0.03038
Ginseng	2,3,8-Trimethyldecane	5.50879	0.030214
Ginseng	2,6,10,15-tetramethylheptadecane	13.7338	0.12959
Ginseng	2-Methyltridecane	5.74986	0.039044
Ginseng	20(R)-Ginsenoside-Rh1	20.127	0.57239
Ginseng	20(S)-Ginsenoside-Rh1	20.127	0.57259
Ginseng	20(S)-ginsenoside-Rg2	20.127	0.25819
Ginseng	20(S)-protopanaxadiol	29.692	0.77148
Ginseng	20-(R)-Ginsenoside-Rg2	20.127	0.25878
Ginseng	20-(S)-Ginsenoside-Rg3	29.692	0.21593
Ginseng	20-Hexadecanoylingenol	28.204	0.68325
Ginseng	2，6-dimethyl-3,7-Octadiene-2，6-diol	37.3181	0.031097
Ginseng	3,4-Dimethylheptane	46.6745	0.012044
Ginseng	3,5-Dimethyl-4-methoxybenzoic acid	61.1055	0.047297
Ginseng	3-O-beta-D-Glucuronopyranosyl gypsogenin	8.68059	0.32446
Ginseng	3-ethyl-3-methylheptane	37.3345	0.017734
Ginseng	3-methylheptane	37.0962	0.0079803
Ginseng	3-methylundecane	6.57435	0.023915
Ginseng	4-Methyldodecane	6.38949	0.030047
Ginseng	5-(2-Methylpropyl)nonane	6.08009	0.026968
Ginseng	5-(Heptadec-12-enyl) resorcinol	3.29074	0.3225
Ginseng	5-methyl-tetradecane	16.1533	0.046466
Ginseng	6"-Malonylginsenoside Rd1	42.3058	0.026846
Ginseng	7-(beta-Xylosyl)cephalomannine	27.3256	0.17471
Ginseng	7-Tetradecyne	20.066	0.039931
Ginseng	7alpha-L-Rhamnosyl-6-methoxylutcolin	15.0297	0.78679
Ginseng	Acetal	26.3961	0.0087235
Ginseng	Adenosine triphosphate	8.22979	0.5781
Ginseng	Adenosine	18.4421	0.1788
Ginseng	Alloaromadendrene	53.0188	0.10413
Ginseng	Aposiopolamine	66.6469	0.21999
Ginseng	Araloside A	16.9637	0.063469
Ginseng	Araloside A_qt	14.3559	0.7559
Ginseng	Argininyl-fructosyl-glucose	11.2505	0.61876
Ginseng	Bicyclogermacrene	27.9982	0.083628
Ginseng	Biotin	75.753	0.095535
Ginseng	Campesteryl ferulate	22.0978	0.59194
Ginseng	Celabenzine	101.883	0.48772
Ginseng	Chrysanthemaxanthin	38.724	0.58277
Ginseng	Citronellal	50.7785	0.020405
Ginseng	D-Mannuronic acid	56.172	0.055106
Ginseng	Dauricine	23.6505	0.36982
Ginseng	Deoxyharringtonine	39.2744	0.8116
Ginseng	Dianthramine	40.4464	0.19676
Ginseng	Dibutyl phthalate	71.2869	0.1338
Ginseng	Diterbutyl phthalate	43.6687	0.12938
Ginseng	Dodecanol	18.4264	0.03281
Ginseng	Eicosanetetraenoic acid	45.5732	0.20491
Ginseng	Elemicin	24.7725	0.06086
Ginseng	Folinic acid	23.6004	0.74022
Ginseng	Frutinone A	65.9037	0.34184
Ginseng	Gamma-Selinene	22.5808	0.08087
Ginseng	Gamma-Sitosterol	36.9139	0.75013
Ginseng	Ginsenoside-La	17.7374	0.13863
Ginseng	Ginsenoside-R0	12.9411	0.054963
Ginseng	Ginsenoside-Ra0	29.692	0.014792
Ginseng	Ginsenoside-Ra1	29.692	0.018342
Ginseng	Ginsenoside-Ra2	29.692	0.018521
Ginseng	Ginsenoside-Ra3	16.795	0.017309
Ginseng	Ginsenoside-Rb1	29.692	0.038125
Ginseng	Ginsenoside-Rb2	29.692	0.043353
Ginseng	Ginsenoside-Rb3	16.8927	0.043345
Ginseng	Ginsenoside-Rc	29.692	0.043559
Ginseng	Ginsenoside-Rd	16.7625	0.094758
Ginseng	Ginsenoside-Re	20.127	0.12287
Ginseng	Ginsenoside-Rf	20.127	0.24168
Ginseng	Ginsenoside-Rg1	11.7373	0.27807
Ginseng	Ginsenoside-Rg3	29.692	0.21625
Ginseng	Ginsenoside-Rh1	20.127	0.57239
Ginseng	Ginsenoside-Rh2	11.4675	0.55868
Ginseng	Ginsenoside-Rh3	13.0912	0.58836
Ginseng	Ginsenoside-Rh4	31.1121	0.59893
Ginseng	Ginsenoside-Rs1	11.873	0.03995
Ginseng	Ginsenoside-Rs2	11.873	0.040138
Ginseng	Ginsenoyne A	66.2186	0.13444
Ginseng	Ginsenoyne B	39.7878	0.12668
Ginseng	Ginsenoyne C	43.381	0.13166
Ginseng	Ginsenoyne D	19.3215	0.12903
Ginseng	Ginsenoyne E	36.5275	0.13269
Ginseng	Girinimbine	61.2153	0.31484
Ginseng	Gomisin B	31.9904	0.82858
Ginseng	Hexadecanoic acid	19.2966	0.098352
Ginseng	Humulene epoxide I	33.4018	0.09682
Ginseng	Isocitric acid b	32.9496	0.044297
Ginseng	Isocitric acid c	65.429	0.044308
Ginseng	Isocitric acid d	8.33771	0.044302
Ginseng	Isocnidilide	85.0237	0.065208
Ginseng	Kaempferol-3-arabofuranoside	2.72822	0.65081
Ginseng	Kaempferol-3-arabofuranoside_qt	41.9093	0.24067
Ginseng	Malkangunin	57.7138	0.62642
Ginseng	Malonylginsenoside Rc	7.8413	0.030597
Ginseng	Malonylginsenoside Rc_qt1	17.7443	0.14577
Ginseng	Malonylginsenoside Rd	8.83686	0.065535
Ginseng	Malonylginsenoside Rd_qt1	42.3058	0.14567
Ginseng	Malvic acid	30.9885	0.15423
Ginseng	Methyl hexadecanoate	9.85113	0.11575
Ginseng	Methyl stearate	16.8031	0.16334
Ginseng	Methyl tricosanoate	14.6093	0.32985
Ginseng	Mycosinol	82.124	0.094081
Ginseng	N,N-Dimethyldecanamide	55.4971	0.041167
Ginseng	N-Salicylidene-salicylamine	80.8463	0.10921
Ginseng	Nonacosanediol-6,8	17.7906	0.031056
Ginseng	Notoginsenoside R2	20.127	0.27685
Ginseng	Notoginsenoside R6	17.7374	0.11605
Ginseng	Octadecyl Acetate	16.2663	0.19391
Ginseng	Palmitoleic acid	35.7759	0.10002
Ginseng	Panaxadiol	33.088	0.79404
Ginseng	Panaxatriol	35.1779	0.79212
Ginseng	Panaxynol	16.0994	0.098918
Ginseng	Panaxytriol	33.7583	0.12899
Ginseng	Pancratistatin	13.1344	0.45995
Ginseng	Pandamine	16.1473	0.79075
Ginseng	Pentadecanoic acid	20.1846	0.080888
Ginseng	Protopanaxtriol	10.3145	0.78017
Ginseng	Protopine	57.5904	0.82693
Ginseng	Pseudohypericin	18.9156	0.073558
Ginseng	Pyrrole-2-aldehyde	41.5815	0.010115
Ginseng	Ramalic acid	5.99708	0.29665
Ginseng	Se-Methyl-L-selenocysteine	35.7355	0.010179
Ginseng	Stigmasterol-beta-D-glucoside	43.8299	0.62938
Ginseng	Suchilactone	57.5188	0.55573
Ginseng	Suffruticoside A	5.61416	0.63544
Ginseng	Tauremisin	29.2112	0.1974
Ginseng	Tetradecane	15.9412	0.039319
Ginseng	Trans-9-Trans-12-Linoleic acid	41.9044	0.14374
Ginseng	Tridecanoic acid	22.3157	0.054133
Ginseng	Trifolirhizin	77.0353	0.78545
Ginseng	Undecane, 3,6-dimethyl	12.8464	0.02896
Ginseng	Vitamin B15	10.0772	0.31928
Ginseng	Vitamin B5	21.2932	0.060324
Ginseng	alpha-Cadinol	31.6928	0.093126
Ginseng	alpha-Farnesene	8.46919	0.047295
Ginseng	alpha-Guriunene	52.2697	0.10397
Ginseng	alpha-Guttiferin	4.4258	0.64929
Ginseng	bata-Caryophyllene	30.5562	0.089885
Ginseng	beta-Bisabolene	31.8354	0.055303
Ginseng	beta-Elemene	20.1953	0.060503
Ginseng	beta-Humulene	26.2325	0.061242
Ginseng	beta-Santalol	35.2834	0.088125
Ginseng	beta-Selinene	25.1004	0.081067
Ginseng	cis-11-elcosenoic acid methyl ester	29.4944	0.22592
Ginseng	cis-Widdrol alpha-epoxide	69.0431	0.14728
Ginseng	dammarane	19.7342	0.70137
Ginseng	daucosterin	36.9139	0.62713
Ginseng	delta-Elemene	25.6142	0.060203
Ginseng	delta-Guaiene	32.7899	0.072024
Ginseng	epsilon-Cadinene	15.7667	0.077488
Ginseng	ginsenoside Rg5	39.5631	0.22766
Ginseng	methyl heptadecanoate	17.4088	0.13808
Ginseng	methyl linoleate	41.9344	0.16713
Ginseng	methyl myristate	14.5982	0.079699
Ginseng	methyl pentadecanoate	11.252	0.096511
Ginseng	n-Octane	29.716	0.0072627
Ginseng	oleanane	6.69072	0.75839
Ginseng	p-Glucosyloxymandelonitrile	7.31257	0.21483
Ginseng	palmitelaidic acid methyl ester	34.6123	0.11731
Ginseng	pentadecane	4.90775	0.049012
Ginseng	dammara-(20 E )22,25-diene-3 β ,6 α ,12 β ,24 S -tetrol	31.0556	0.81021
Ginseng	ginsenoside Rh19	9.34471	0.79823
Ginseng	ginsenoside Rh20	20.127	0.53774
Ginseng	12 β,23( R)-epo x ydammara-24-ene- 3β,6 α,20( S)-triol	25.6697	0.24397
Dioscorea opposite	(24S)-belta-Methyl cholest-8(14)-enol	7.3257	0.71676
Dioscorea opposite	(24S)-belta-Methyl cholestanol	25.8095	0.71266
Dioscorea opposite	hancinol	64.0133	0.37314
Dioscorea opposite	hancinone C	59.0459	0.38965
Dioscorea opposite	choline	0.471816	0.0087169
Dioscorea opposite	N-isobutyl-deca-trans-2-trans-4-dienamide	33.4634	0.061348
Dioscorea opposite	crotepoxide	27.0184	0.43858
Dioscorea opposite	abscisinII	63.6722	0.12727
Dioscorea opposite	clerosterol	7.56035	0.7581
Dioscorea opposite	24-Methylcholest-5-enyl-3belta-O-glucopyranoside	37.5768	0.66575
Dioscorea opposite	24-Methylcholesta-5,7,22-trien-ebelta-ol	18.2243	0.72454
Dioscorea opposite	burchellin	3.22759	0.43207
Dioscorea opposite	campesterol	37.5768	0.71488
Dioscorea opposite	24-methylenecholesterol	13.6154	0.72038
Dioscorea opposite	isofucosterol	43.7764	0.7576
Dioscorea opposite	dopamine	74.3995	0.031027
Dioscorea opposite	diosgenin	14.1544	0.8097
Dioscorea opposite	batatasinI	23.7045	0.26599
Dioscorea opposite	γ-aminobutyric acid	26.0124	0.0070055
Dioscorea opposite	batatasinⅢ	3.75007	0.12242
Dioscorea opposite	ergosterol	46.1849	0.72428
Dioscorea opposite	cholesterol	7.88205	0.67799
Dioscorea opposite	piperlonguminine	26.1409	0.18018
Dioscorea opposite	batatasinⅣ	82.7618	0.12249
Dioscorea opposite	cholestanol	25.6336	0.67472
Dioscorea opposite	holest-7-enol	11.8065	0.67817
Dioscorea opposite	stigmasterol	7.05882	0.75757
Dioscorea opposite	phytic acid	4.23767	0.49848
Dioscorea opposite	denudatin B	31.4818	0.37845
Dioscorea opposite	kadsurenone	89.4582	0.37824
Dioscorea opposite	allantoin	106.679	0.033656
Dioscorea opposite	Abscisic acid	31.7885	0.12727
Dioscorea opposite	Batatasin IV	3.76257	0.1226
Dioscorea opposite	Cholesteryl ferulate	22.4254	0.62885
Dioscorea opposite	Deltoside	27.9679	0.02691
Dioscorea opposite	Dihydroquercetin	23.4013	0.27342
Dioscorea opposite	Dioscoreside C	36.2986	0.053161
Dioscorea opposite	Diosgenin-3-O-beta-D-glucopyranoside	15.8427	0.28771
Dioscorea opposite	Doradexanthin	38.1558	0.53662
Dioscorea opposite	Methylcimicifugoside	46.3127	0.091883
Dioscorea opposite	Phytocassane A	24.476	0.31288
Dioscorea opposite	Stigmasterol-beta-D-glucoside	43.8299	0.62935
Dioscorea opposite	hancinone B	45.3284	0.77301
Dioscorea opposite	hancinone D	0.981136	0.67658
Dioscorea opposite	denudatin A	58.8058	0.43711
Dioscorea opposite	3,5-dihydroxy-4-methoxybibenzyl	49.553	0.12075
Dioscorea opposite	3,3',5-trihydroxy-2'-methoxybibenzyl	83.8822	0.14569
Dioscorea opposite	10,11-dihydro-dibenz[b, f]oxepin-2,4-diol	54.513	0.16094
Dioscorea opposite	10,11-dihydro-4-methoxy-dibenz[b, f]oxepin-2-ol	44.4467	0.18302
Dioscorea opposite	tristin	1.98489	0.14621
Dioscorea opposite	2',3,5-trihydroxybibenzyl	102.176	0.1076
Dioscorea opposite	2',4-dihydroxy-3,5-dimethoxybibenzyl	83.8127	0.16114
Dioscorea opposite	3,4-dimethoxy-2'-hydroxybibenzyl	85.0609	0.16141
Dioscorea opposite	3,5-dimethoxy-2,7-phenanthrenediol	67.6535	0.23636
Dioscorea opposite	hircinol	19.2234	0.1818
Dioscorea opposite	9,10-dihydro-7-methoxy-2,5-phenanthrenediol	70.5554	0.18386
Dioscorea opposite	(1 E,4 E,6 E)-1,7-bis(4-hydroxyphenyl)-1,4,6-hepta-trien-3-one	74.1822	0.2375
Dioscorea opposite	(4 E,6 E)-7-(4-hydroxy-3-methoxyphenyl)-1-(4-hydroxyphenyl)-4,6-heptadien-3-one	3.62075	0.30711
Dioscorea opposite	(3R,5 R)-3,5-dihydroxy-1, 7-bis(4-hydroxyphenyl)-3,5-heptanediol	5.54701	0.25137
Dioscorea opposite	(3R,5 R)-1, 7-bis(4-hydroxy-3-methoxyphenyl)-3,5-heptanediol	5.50463	0.40312
Dioscorea opposite	palmitic acid	19.2966	0.098573
Dioscorea opposite	beta-Sitosterol	36.9139	0.75096
Dioscorea opposite	cis-9-Octadecenoic acid	33.1284	0.14241
Dioscorea opposite	BETA-SITOSTEROL ACETATE	40.3896	0.85139
Dioscorea opposite	5-Hydroxymethylfurfural	30.411	0.019429
Dioscorea opposite	Azelaic acid	27.441	0.041313
Dioscorea opposite	Daucosterol	36.9139	0.62416
Dioscorea opposite	dopamine hydrochoride	35.8558	0.031037
Dioscorea opposite	tetrahydroisoquino-line	43.6717	0.032703
radix pseudostellariae	citronellol	36.7638	0.019903
radix pseudostellariae	Z-citral	24.4051	0.020733
radix pseudostellariae	myrtanol	48.3137	0.058731
radix pseudostellariae	E-citral	21.8726	0.020753
radix pseudostellariae	geosmin	97.6495	0.068943
radix pseudostellariae	peonol	30.6239	0.039183
radix pseudostellariae	oleic axid	33.1284	0.14241
radix pseudostellariae	3-methyl-1-butanol acetate	24.6059	0.012314
radix pseudostellariae	dl-limonene	38.9987	0.022355
radix pseudostellariae	4-methyl undecene-1	6.57183	0.023994
radix pseudostellariae	nona-1,8-dien-4-ol	39.6661	0.015549
radix pseudostellariae	(all-E)-2,6,10,15,19,23-Hexamethyl-2,6,10,14,18,22-tetracosahexaene	33.5459	0.41753
radix pseudostellariae	2-minaline	78.7173	0.014865
radix pseudostellariae	3'-furfuryl pyrrole-2-carboxylate	79.8914	0.060224
radix pseudostellariae	3-Furfuryl 2-pyrrolecarboxylate	47.2694	0.060123
radix pseudostellariae	acacetin	33.6388	0.24082
radix pseudostellariae	acaciin	39.8437	0.71048
radix pseudostellariae	behenic acid	15.6884	0.26054
radix pseudostellariae	dibutyl phthalate	32.6919	0.13413
radix pseudostellariae	dihydroferulic acid	9.70606	0.057069
radix pseudostellariae	Dissobutyl phthalate	64.5416	0.131
radix pseudostellariae	ELEUTHEROSIDE A	20.6319	0.6241
radix pseudostellariae	furfural	35.2598	0.010396
radix pseudostellariae	FURFURYL ALCOHOL	48.8664	0.010092
radix pseudostellariae	glyceryl linoleate	37.1766	0.30112
radix pseudostellariae	isoeugenol	70.0132	0.036328
radix pseudostellariae	linoleic acid	41.9044	0.1438
radix pseudostellariae	luteolin	27.723	0.24552
radix pseudostellariae	palmitic acid	19.2966	0.098573
radix pseudostellariae	pyrrol	27.7517	0.0038122
radix pseudostellariae	stearic acid	17.8254	0.14086
radix pseudostellariae	stigmast-7-en-3β-ol	37.4231	0.74915
radix pseudostellariae	taraxerol	38.4025	0.76677
radix pseudostellariae	tripalmitin	16.2926	0.19427
radix pseudostellariae	ursolic acid	16.463	0.75457
radix pseudostellariae	β-sitosterol	36.9139	0.74968
radix pseudostellariae	spinosin	14.6778	0.72115
radix pseudostellariae	jujuboside A	87.3856	0.015086
radix pseudostellariae	jujuboside B	85.6308	0.024326
radix pseudostellariae	jujuboside C	92.1892	0.014061
radix pseudostellariae	daucosterine	36.9139	0.62416
radix pseudostellariae	Lecithin	0.266908	0.29612
radix pseudostellariae	L-ALPHA-PHOSPHATIDYLINOSITOL	8.96258	0.20696
radix pseudostellariae	Glycerophosphoric acid	48.2281	0.022416
radix pseudostellariae	TRIPALMITIN	16.2926	0.19449
radix pseudostellariae	1-METHYL-3-PROPYLBENZENE	28.686	0.02148
radix pseudostellariae	2-METHYL-1H-PYRROLE	46.6434	0.0066964
radix pseudostellariae	phthalic acid,butyl ester	33.1856	0.13434
radix pseudostellariae	1,2-benzenedicarboxylic acid,bis(2-methylpropyl)ester	43.6134	0.014868
radix pseudostellariae	acetic acid,ethyl ester	72.0261	0.13066
radix pseudostellariae	4-methyl-octane	45.0163	0.0045272
radix pseudostellariae	4-hydroxy-4-methyl-2-pentanone	18.5161	0.010653
radix pseudostellariae	（-）-alpha-pinene	57.2875	0.012407
radix pseudostellariae	1,8-cineole	46.2498	0.052565
radix pseudostellariae	2,3-dimethyldecane	39.7292	0.049041
radix pseudostellariae	2-ethylhexyl ester of butanoic acid	16.2645	0.024311
radix pseudostellariae	2-ethylhexyl methacrylate	16.3825	0.036991
radix pseudostellariae	3-methyl-decane	24.8599	0.038097
radix pseudostellariae	2-propyldecan-1-ol	18.0269	0.018491
radix pseudostellariae	3,7-dimethyl-1,6-octadien-3-ol-4-one	19.2522	0.037812
radix pseudostellariae	2-methyl-pentadecane	57.1887	0.030655
radix pseudostellariae	3-(3-hydroxyl-1-butenyl)-2,4,4-trimethyl-2-cyclohexen-1-one	4.71559	0.06002
radix pseudostellariae	2,6-bis(1,1-dimethylethyl)-4-methyl-phenol	30.7121	0.065343
radix pseudostellariae	docosane	40.3153	0.071982
radix pseudostellariae	3-methyl-4,6-di-tert-butyl-phenol	8.36569	0.17997
radix pseudostellariae	hexatriacontane	24.5669	0.072087
radix pseudostellariae	8-methyl-hexacosanol-1	7.94694	0.40927
radix pseudostellariae	3-isopropyl-2-hydroxycyclopent-2-en-1-one	12.9757	0.37819
radix pseudostellariae	Pseudostellaria D	107.808	0.024994
radix pseudostellariae	Pseudostellaria G	4.18336	0.35964
radix pseudostellariae	Pseudostellaria H	8.60413	0.15506
radix pseudostellariae	2-Pentylfuran	54.2463	0.019337
radix pseudostellariae	(all-E)-2,6,10,15,19,23-Hexamethyl-2,6,10,14,18,22-tetracosahexaene	33.5459	0.41747
radix pseudostellariae	Cineole	39.6534	0.049042
radix pseudostellariae	L(-)-Borneol	86.9481	0.05275
radix pseudostellariae	Palmitic acid	19.2966	0.098573
radix pseudostellariae	Caproaldehyde	55.707	0.0055795
radix pseudostellariae	Docosanoic acid	15.6884	0.26054
radix pseudostellariae	Succinic acid	29.6278	0.012082
radix pseudostellariae	tetracosanoic acid	14.9036	0.33367
radix pseudostellariae	Stearic acid	17.8254	0.14086
radix pseudostellariae	2-Heptanone	46.5618	0.0084055
radix pseudostellariae	dihydrofeulic acid	42.8637	0.70839
radix pseudostellariae	Ursolic acid	11.5864	0.75465
radix pseudostellariae	2-heptanol	24.5482	0.0082271
radix pseudostellariae	furfurylmercaptan	31.0735	0.0092116
radix pseudostellariae	benzaldehyde	32.628	0.014162
radix pseudostellariae	1-octen-3-ol	37.258	0.011508
radix pseudostellariae	6-methy-5-hepten-2-one	26.3591	0.012095
radix pseudostellariae	3-octen-2-one	30.4642	0.011641
radix pseudostellariae	2-nonanone	8.69533	0.015263
radix pseudostellariae	L-linaloo	44.7621	0.022682
radix pseudostellariae	vinylanisole	30.4516	0.02204
radix pseudostellariae	（+）-2-bornaone	67.3039	0.053027
radix pseudostellariae	terpine-4-ol	81.4067	0.032323
radix pseudostellariae	myrtanal	38.935	0.059111
radix pseudostellariae	α-terpineol	44.5615	0.030767
radix pseudostellariae	furfury pentanoate	25.8309	0.040356
Panax quinquefolium	6-phenyldodecane	3.98409	0.080858
Panax quinquefolium	6-phenylundecane	4.4353	0.068935
Panax quinquefolium	7-Deacetylcanadensene	7.53251	0.74342
Panax quinquefolium	8E-1,8-heptadecadien-4,6-diyn-3,10-diol	53.8605	0.11378
Panax quinquefolium	9,12,15-octadecatrienoic acid	45.0091	0.1471
Panax quinquefolium	alpha-Farnesene	8.46831	0.047295
Panax quinquefolium	alpha-Guriunene	52.2697	0.10397
Panax quinquefolium	bata-Caryophyllene	30.5562	0.089885
Panax quinquefolium	beta-Bisabolene	31.5617	0.055331
Panax quinquefolium	beta-Curcumene	4.47791	0.055442
Panax quinquefolium	caproic acid	59.3253	0.0089909
Panax quinquefolium	caprylic acid	36.7206	0.016174
Panax quinquefolium	Capsaicin(e)	10.3103	0.19565
Panax quinquefolium	caryophellene	27.3049	0.089902
Panax quinquefolium	Casticin	3.98621	0.43894
Panax quinquefolium	chikusetsu saponin V	12.8431	0.054962
Panax quinquefolium	Danshensuan B	3.01368	0.40766
Panax quinquefolium	Daturilin	50.3651	0.76801
Panax quinquefolium	daucosterol	20.6319	0.62674
Panax quinquefolium	diphosphatidylglycerol	35.0074	0.48303
Panax quinquefolium	Diterbutyl phthalate	48.3905	0.12929
Panax quinquefolium	dodecane	17.7374	0.02413
Panax quinquefolium	Dodecanol	13.622	0.03281
Panax quinquefolium	eleutheroside A	36.9139	0.62458
Panax quinquefolium	Encecalin	43.7059	0.11238
Panax quinquefolium	fructose	12.657	0.034399
Panax quinquefolium	galacturonic acid	27.4758	0.044664
Panax quinquefolium	gensenoside- Rb1	29.692	0.036739
Panax quinquefolium	gensenoside- Rb3	29.6524	0.043154
Panax quinquefolium	ginsenoside- F2	36.4317	0.25334
Panax quinquefolium	ginsenoside- F3	29.692	0.31058
Panax quinquefolium	ginsenoside- Rb2	29.692	0.04336
Panax quinquefolium	ginsenoside- Rc	29.692	0.043567
Panax quinquefolium	ginsenoside- Re	19.9012	0.12548
Panax quinquefolium	ginsenoside- Rf	20.127	0.24146
Panax quinquefolium	ginsenoside- Rg1	20.127	0.27815
Panax quinquefolium	ginsenoside- Rg2	20.1182	0.25199
Panax quinquefolium	ginsenoside- Rg3	29.692	0.2166
Panax quinquefolium	ginsenoside- Rh1	11.6568	0.57226
Panax quinquefolium	ginsenoside- Rh2	14.3404	0.56017
Panax quinquefolium	ginsenoside- Ro	16.0798	0.054961
Panax quinquefolium	ginsenoside-Ra0	29.692	0.014791
Panax quinquefolium	Ginsenoside-Ra1	29.692	0.018342
Panax quinquefolium	Ginsenoside-Rd	29.692	0.094784
Panax quinquefolium	gypenoside XI	29.692	0.099176
Panax quinquefolium	gypenosideⅧ	29.6524	0.093781
Panax quinquefolium	gypenosideIII	17.9486	0.085844
Panax quinquefolium	gypenosideXVII	16.7309	0.10078
Panax quinquefolium	heptadeca-1,8-dien-4,6-diyn-3,10-diol	53.8605	0.11387
Panax quinquefolium	heptadecanoic acid	18.5106	0.11821
Panax quinquefolium	heptanoic acid	25.1692	0.01216
Panax quinquefolium	hexadecane	12.3163	0.060928
Panax quinquefolium	Hexadecanoic acid	19.2966	0.098342
Panax quinquefolium	Isofernene	15.4896	0.7692
Panax quinquefolium	lecithin	0.327522	0.32787
Panax quinquefolium	Lindenene	42.9734	0.15733
Panax quinquefolium	longifolene	44.3343	0.10826
Panax quinquefolium	lysolecithin	0.272515	0.52931
Panax quinquefolium	malonyl ginsenoside Rd	14.1808	0.75925
Panax quinquefolium	malonyl-ginsenoside Rb1	42.3058	0.026846
Panax quinquefolium	malonyl-ginsenoside Rb2	42.3058	0.030468
Panax quinquefolium	malonyl-ginsenoside Rd	7.60783	0.065562
Panax quinquefolium	Methyl caprylate	18.775	0.020742
Panax quinquefolium	n-Nonanol	33.1535	0.014845
Panax quinquefolium	n-octadecanoic acid	17.8254	0.14085
Panax quinquefolium	nonanoic acid	53.7849	0.021141
Panax quinquefolium	ocotillol	36.2076	0.8182
Panax quinquefolium	octanol	21.0518	0.010949
Panax quinquefolium	oleanolic acid	28.9048	0.75589
Panax quinquefolium	panaxydol	23.815	0.13159
Panax quinquefolium	panaxynol	20.0729	0.098911
Panax quinquefolium	panaxytriol	33.7583	0.12807
Panax quinquefolium	Papaverine	64.0428	0.37821
Panax quinquefolium	pelargonic acid	37.4266	0.02118
Panax quinquefolium	Phenol	69.2612	0.010539
Panax quinquefolium	Phenyl isothiocyanate	67.6379	0.020886
Panax quinquefolium	Phenyl-2-propanone	35.6739	0.022235
Panax quinquefolium	Phenylethyl acetate	22.9916	0.035232
Panax quinquefolium	Phlegmariuine-N	51.6642	0.062385
Panax quinquefolium	phosphatidylinositol	12.6628	0.28514
Panax quinquefolium	phosphatidylserine	28.5549	0.23763
Panax quinquefolium	pinocarveol	51.3831	0.060923
Panax quinquefolium	polyacetylene PQ-1	49.3299	0.14164
Panax quinquefolium	polyacetylene PQ-2	36.7401	0.19512
Panax quinquefolium	PQ-2	36.7401	0.19434
Panax quinquefolium	Praeruptorin A	19.8043	0.40117
Panax quinquefolium	pseudoginsenoside F11	24.555	0.19068
Panax quinquefolium	pseudoginsenoside RT5	9.44333	0.45752
Panax quinquefolium	pulegone	51.134	0.029676
Panax quinquefolium	Pulsatillic acid	24.418	0.7688
Panax quinquefolium	pyridoxine	61.5404	0.040988
Panax quinquefolium	sorbose	1.55337	0.034389
Panax quinquefolium	stearic acid	17.8254	0.14079
Panax quinquefolium	stigmast-3,5-dien-3-one	43.8672	0.74604
Panax quinquefolium	stigmast-7-enol	37.4231	0.75013
Panax quinquefolium	Trans-9-Trans-12-Linoleic acid	41.9044	0.14377
Panax quinquefolium	Trilinolein	34.9108	0.14259
Panax quinquefolium	undecane	17.7215	0.018468
Panax quinquefolium	vitamin A	18.4616	0.15642
Panax quinquefolium	vitamin B6	53.5747	0.040988
Panax quinquefolium	α-cedrene	50.9026	0.10493
Panax quinquefolium	α-curcumene( R-)	25.6679	0.055978
Panax quinquefolium	α-curcumene( S-)	4.14544	0.055977
Panax quinquefolium	644-30-4	25.6679	0.055978
Panax quinquefolium	β-bisabolene	31.1903	0.055282
Panax quinquefolium	β-caryophyllene	29.8793	0.089887
Panax quinquefolium	β-farnesene	7.4659	0.047599
Panax quinquefolium	β-gurjunene	52.6732	0.11403
Panax quinquefolium	quinquefoloside-L	49.504	0.042238
Panax quinquefolium	gypenoside LXXI	29.1622	0.31696
Panax quinquefolium	majoroside-F 1	38.0338	0.092192
Panax quinquefolium	ginsenosid e-Re	38.7186	0.12922
Panax quinquefolium	ginsenoside-Rb1	52.4699	0.038132
Panax quinquefolium	20(S)-protopanaxatriol-6- O -α -L-rhamnopyranosyl (1→2)-β- D-6'- O-acetylglucopyranoside	23.7514	0.23124
Panax quinquefolium	(2S,3S,4R,20 E)-2-[(2′R)-2′-hydroxyl-palmitoyl-amino]-20-hexacosene-1, 3, 4-triol	13.9904	0.29236
Panax quinquefolium	12, 13, 15-trihydroxy-9-octadecenoic acid	12.7057	0.21706
Panax quinquefolium	16-Oxoseratenediol	14.9844	0.75175
Panax quinquefolium	1-phenylhexane	18.9191	0.03132
Panax quinquefolium	2-(rho-Cyclohexyl-phenoxy)ethanol	42.3497	0.08343
Panax quinquefolium	2,6-di-tert-butyl-4-methylphenol	40.3153	0.071982
Panax quinquefolium	20-(R)-Ginsenoside-Rg2	10.0923	0.25869
Panax quinquefolium	20(R)-Ginsenoside-Rh1	8.38216	0.57212
Panax quinquefolium	20-(S)-Ginsenoside-Rg3	11.3965	0.21594
Panax quinquefolium	20-Hexadecanoylingenol	28.204	0.67758
Panax quinquefolium	2-methoxy-4-(1-propenyl)phenol	57.3575	0.036326
Panax quinquefolium	2-Phenyldodecane	4.53474	0.097721
Panax quinquefolium	3-cyclohexyldodecane	3.66209	0.088428
Panax quinquefolium	3-Methoxyherbacetin	23.8353	0.29589
Panax quinquefolium	3-O-beta-D-Xylopyranosyl-(1-6)-beta-D-glucopyranosyl-(1-6)-beta-D-glucopyranosyl oleanolic acid 28-O-beta-D-glucopyranosyl ester	13.904	0.75634
Panax quinquefolium	3-Octanol	27.1288	0.011211
Panax quinquefolium	3-phenyldecane	4.92662	0.063524
Panax quinquefolium	3-phenyldodecane	3.93296	0.091462
Panax quinquefolium	3-phenylhexane	38.618	0.030683
Panax quinquefolium	3-phenylundecane	4.25755	0.076331
Panax quinquefolium	4-phenyldodecane	3.88732	0.086393
Panax quinquefolium	4-phenyltridecane	33.0849	0.10268
Panax quinquefolium	4-phenylundecane	3.3807	0.07211
Panax quinquefolium	5-phenyldodecane	2.92021	0.082682
Panax quinquefolium	5-Phenyldolecane	4.96651	0.082929
Panax quinquefolium	5-phenyltridecane	33.0849	0.098117
Radix Glycyrrhiza	2’,7-Dihydroxy-4’-methoxyisoflavan-7-O-β-d-glucopyranoside	59.6129	0.72971
Radix Glycyrrhiza	Carene-4	45.0225	0.042624
Radix Glycyrrhiza	3-Hydroxyglabrol	4.72628	0.58262
Radix Glycyrrhiza	(E)-1-butoxy-2-hexene	41.7177	0.019399
Radix Glycyrrhiza	Shinflavanone	31.787	0.72403
Radix Glycyrrhiza	18β-glycyrrhetic acid	22.0526	0.7429
Radix Glycyrrhiza	euchrenone	30.2873	0.57386
Radix Glycyrrhiza	glucuronic acid	46.1828	0.055111
Radix Glycyrrhiza	glyasperin B	65.2244	0.43851
Radix Glycyrrhiza	glyasperin E	4.12294	0.74564
Radix Glycyrrhiza	glyasperin F	75.8368	0.53514
Radix Glycyrrhiza	glyasperins C	45.5638	0.39947
Radix Glycyrrhiza	glyasperins D	29.9089	0.43336
Radix Glycyrrhiza	glyasperins Z	4.17367	0.36008
Radix Glycyrrhiza	isotrifoliol	35.242	0.42423
Radix Glycyrrhiza	kanzonol B	39.6169	0.35077
Radix Glycyrrhiza	Ursolic acid	37.732	0.75455
Radix Glycyrrhiza	Benzene，1，2-dimethyl	45.8237	0.014755
Radix Glycyrrhiza	kanzonol Y	1.06411	0.47575
Radix Glycyrrhiza	kanzonols K	0.969694	0.66354
Radix Glycyrrhiza	kanzonols L	0.980581	0.77581
Radix Glycyrrhiza	kanzonols T	1.44818	0.66937
Radix Glycyrrhiza	kanzonols W	50.4801	0.51704
Radix Glycyrrhiza	kanzonols X	7.55929	0.556
Radix Glycyrrhiza	licoagrochalcone A	1.04109	0.27486
Radix Glycyrrhiza	licoagropin	27.1413	0.51258
Radix Glycyrrhiza	licofuranocoumarin	60.2504	0.63433
Radix Glycyrrhiza	maackiain	63.0739	0.53753
Radix Glycyrrhiza	glyinflanin A	1.06481	0.4785
Radix Glycyrrhiza	Benzene，1，3-dimethyl	46.9537	0.014128
Radix Glycyrrhiza	naringin	6.91782	0.77898
Radix Glycyrrhiza	naringin-qt	64.0354	0.2114
Radix Glycyrrhiza	α-cadinol	65.539	0.085706
Radix Glycyrrhiza	β-sitosterol	36.9139	0.75096
Radix Glycyrrhiza	Betulinic acid	13.7826	0.77591
Radix Glycyrrhiza	semilicoisoflavone B	48.7776	0.54732
Radix Glycyrrhiza	DL-Menthol	59.3294	0.029138
Radix Glycyrrhiza	glepidotin A	44.7219	0.34685
Radix Glycyrrhiza	Glepidotin B	64.4629	0.34485
Radix Glycyrrhiza	kanzonol C	1.02304	0.45318
Radix Glycyrrhiza	1,3-Octadiene	34.5319	0.0075775
Radix Glycyrrhiza	butyl benzoate	48.4128	0.040921
Radix Glycyrrhiza	phaseollinisoflavan	32.0081	0.44538
Radix Glycyrrhiza	pallidiflovene	4.66465	0.21087
Radix Glycyrrhiza	glypallichalcone	61.5971	0.18993
Radix Glycyrrhiza	formononetin	32.4168	0.21201
Radix Glycyrrhiza	echinatin	66.584	0.16689
Radix Glycyrrhiza	scopoletin	33.1879	0.076139
Radix Glycyrrhiza	dibenzoylmethane	62.2573	0.097803
Radix Glycyrrhiza	dibutyl phthalate	64.5416	0.13418
Radix Glycyrrhiza	Eicosanoic acid	16.6564	0.19499
Radix Glycyrrhiza	kanzonol U	76.5174	0.38108
Radix Glycyrrhiza	Benzene，1，4-dimethyl	48.7427	0.014016
Radix Glycyrrhiza	1,2-trans-dimethylcyclopentane	41.7792	0.010335
Radix Glycyrrhiza	liconeolignan	4.40558	0.40281
Radix Glycyrrhiza	licochalcone A	45.7436	0.28512
Radix Glycyrrhiza	Licochalcone B	76.7574	0.1935
Radix Glycyrrhiza	licochalcone C	4.43878	0.29203
Radix Glycyrrhiza	licochalconeD	56.1125	0.34281
Radix Glycyrrhiza	glabrol	4.24781	0.54375
Radix Glycyrrhiza	apioglycyrrhizin	17.8012	0.13639
Radix Glycyrrhiza	licochalcone G	2.34776	0.32325
Radix Glycyrrhiza	2,2-dimethylpentane	55.3286	0.0083461
Radix Glycyrrhiza	licoarylcoumarin	59.6225	0.42894
Radix Glycyrrhiza	liquoric acid	25.4419	0.54761
Radix Glycyrrhiza	Licoflavone A	18.7521	0.33262
Radix Glycyrrhiza	Licoflavone B	4.44101	0.55723
Radix Glycyrrhiza	licoflavonol	8.74925	0.40191
Radix Glycyrrhiza	Licoflavanone	33.8127	0.37784
Radix Glycyrrhiza	licoricone	63.5785	0.4712
Radix Glycyrrhiza	gancaonin A	51.0728	0.40378
Radix Glycyrrhiza	gancaonin B	48.7944	0.44924
Radix Glycyrrhiza	gancaonin C	2.8683	0.41708
Radix Glycyrrhiza	licorice glycoside E	33.8587	0.27218
Radix Glycyrrhiza	2,3-dimethylhexane	46.236	0.0091903
Radix Glycyrrhiza	gancaonin D	56.3378	0.51055
Radix Glycyrrhiza	gancaonin E	1.21049	0.6262
Radix Glycyrrhiza	gancaonin L	66.3713	0.41392
Radix Glycyrrhiza	Gancaonin M	30.4888	0.41002
Radix Glycyrrhiza	Gancaonin N	2.46619	0.44855
Radix Glycyrrhiza	gancaonin O	44.152	0.41482
Radix Glycyrrhiza	gancaonin P	1.41392	0.44914
Radix Glycyrrhiza	gancaonin Q	8.97617	0.59825
Radix Glycyrrhiza	gancaonin R	1.2616	0.37435
Radix Glycyrrhiza	gancaonin S	1.2616	0.37563
Radix Glycyrrhiza	2,3-dimethylpentane	35.573	0.0071236
Radix Glycyrrhiza	gancaonin T	1.04355	0.52555
Radix Glycyrrhiza	gancaonin U	14.5291	0.52801
Radix Glycyrrhiza	gancaonin V	1.24473	0.33687
Radix Glycyrrhiza	glicoricone	2.47014	0.43993
Radix Glycyrrhiza	Glycyrrhizic Acid	19.6173	0.11053
Radix Glycyrrhiza	licoricidin	0.985552	0.62419
Radix Glycyrrhiza	Glycycoumarin	23.5619	0.44043
Radix Glycyrrhiza	glycyrin	52.6066	0.47466
Radix Glycyrrhiza	morachalcone A	1.3607	0.30435
Radix Glycyrrhiza	5,6,7,8-Tetrahydro-2,4-dimethylquinoline	49.7749	0.049013
Radix Glycyrrhiza	licocoumarone	29.7893	0.3568
Radix Glycyrrhiza	licoisoflavone A	41.6102	0.41646
Radix Glycyrrhiza	licoisoflavone B	38.9287	0.54714
Radix Glycyrrhiza	licoisoflavanone	52.4662	0.54488
Radix Glycyrrhiza	licorice-saponin C2	59.6582	0.11439
Radix Glycyrrhiza	licorice-saponin F3	3.40035	0.026112
Radix Glycyrrhiza	shinpterocarpin	80.2953	0.72746
Radix Glycyrrhiza	2,4-dimethylhexane	37.1262	0.0086447
Radix Glycyrrhiza	licorice-saponin G2	6.39056	0.10796
Radix Glycyrrhiza	licorice-saponin H2	7.65565	0.11049
Radix Glycyrrhiza	licorice-saponin J2	6.25206	0.11169
Radix Glycyrrhiza	5'-Prenylbutein	46.2679	0.3062
Radix Glycyrrhiza	1-butanol	87.9205	0.0021339
Radix Glycyrrhiza	licorice-saponin B2	58.5477	0.11436
Radix Glycyrrhiza	2-Caren-10-al	44.7414	0.049552
Radix Glycyrrhiza	licorice-saponin K2	10.4397	0.11171
Radix Glycyrrhiza	glycyrrhetol	14.6578	0.75393
Radix Glycyrrhiza	liquiritin	65.6901	0.73893
Radix Glycyrrhiza	liquiritin-qt	33.3519	0.18304
Radix Glycyrrhiza	liquiritogenin	71.7844	0.18316
Radix Glycyrrhiza	licopyranocoumarin	80.36	0.6535
Radix Glycyrrhiza	Glyuranolide	15.5618	0.54718
Radix Glycyrrhiza	Heptanal	19.6002	0.0080592
Radix Glycyrrhiza	Heptane	41.7994	0.0049914
Radix Glycyrrhiza	Hispaglabridin B	22.9382	0.88246
Radix Glycyrrhiza	2-heptanone	46.5618	0.0084055
Radix Glycyrrhiza	glyzaglabrin	61.0689	0.35347
Radix Glycyrrhiza	glabridin	53.2451	0.46967
Radix Glycyrrhiza	glabrolide	17.4626	0.612
Radix Glycyrrhiza	glabranin	52.8957	0.31208
Radix Glycyrrhiza	glabrene	46.2669	0.43902
Radix Glycyrrhiza	glabrone	52.5122	0.49645
Radix Glycyrrhiza	hedysarimcoumestan B	54.1589	0.42832
Radix Glycyrrhiza	hedysarimcoumestan E	58.8478	0.5276
Radix Glycyrrhiza	5-hydroxy-2-(4-hydroxyphenyl)-3,7-dimethoxy-4H-chromen-4-one	10.6108	0.29148
Radix Glycyrrhiza	Eurycarpin A	43.2773	0.37429
Radix Glycyrrhiza	2-methyl-5-propyl -nonane	15.2764	0.027139
Radix Glycyrrhiza	glycyroside	37.2503	0.79156
Radix Glycyrrhiza	glycyroside_qt	32.4168	0.21201
Radix Glycyrrhiza	lupiwighteone	58.5666	0.36739
Radix Glycyrrhiza	Hexane	52.4977	0.0032498
Radix Glycyrrhiza	methylcyclohexane	56.2005	0.0095813
Radix Glycyrrhiza	methylcyclopentane	55.7789	0.0063993
Radix Glycyrrhiza	Docosyl caffeate	3.13854	0.59182
Radix Glycyrrhiza	diisobutyl phthalate	28.5476	0.13124
Radix Glycyrrhiza	rutin	3.20153	0.68285
Radix Glycyrrhiza	rutin-qt	46.549	0.27525
Radix Glycyrrhiza	2-methyl-6-ethyl decane	5.49557	0.028041
Radix Glycyrrhiza	ononin	13.2791	0.7756
Radix Glycyrrhiza	ononin_qt	31.9198	0.21201
Radix Glycyrrhiza	medicarpin-3-O-glucoside	71.4677	0.95059
Radix Glycyrrhiza	medicarpin	71.5105	0.33505
Radix Glycyrrhiza	vitexin	3.05004	0.70754
Radix Glycyrrhiza	choerospondin	38.3751	0.78113
Radix Glycyrrhiza	2-METHYLHEPTANE	28.6523	0.0077549
Radix Glycyrrhiza	Hispaglabridin A	14.5955	0.73168
Radix Glycyrrhiza	Oleanic acid	17.6726	0.75598
Radix Glycyrrhiza	pinocembrin	46.6455	0.17998
Radix Glycyrrhiza	violanthin	4.17259	0.81118
Radix Glycyrrhiza	kaempferol	42.3019	0.24066
Radix Glycyrrhiza	pentadecanol	13.7297	0.0639
Radix Glycyrrhiza	narcissin	51.5264	0.65226
Radix Glycyrrhiza	2-methylhexane	49.3867	0.0055849
Radix Glycyrrhiza	uralenol	8.54848	0.45608
Radix Glycyrrhiza	uralenol-3-methylether	1.40625	0.49232
Radix Glycyrrhiza	uralsaponin A	9.05695	0.11048
Radix Glycyrrhiza	uralsaponin B	17.7607	0.11099
Radix Glycyrrhiza	hexanes	56.1255	0.0039126
Radix Glycyrrhiza	uralenin	34.8811	0.41455
Radix Glycyrrhiza	uralene	11.7036	0.49424
Radix Glycyrrhiza	uralenneoside	25.4021	0.17329
Radix Glycyrrhiza	schaftoside	29.703	0.74878
Radix Glycyrrhiza	n-octane	29.716	0.0072627
Radix Glycyrrhiza	neoglycyrol	29.8717	0.66815
Radix Glycyrrhiza	neoliquiritin	71.123	0.71269
Radix Glycyrrhiza	2-dodecene	17.7435	0.024561
Radix Glycyrrhiza	neouralenol	6.77139	0.45647
Radix Glycyrrhiza	neoisoliquiritin	82.0465	0.5775
Radix Glycyrrhiza	nicotiflorin	41.7927	0.72568
Radix Glycyrrhiza	Ethylbenzene	49.272	0.012997
Radix Glycyrrhiza	ethyl cyclobutanol	93.2331	0.019135
Radix Glycyrrhiza	isobavachin	36.5654	0.32291
Radix Glycyrrhiza	2-Tetradecanone	17.7137	0.051898
Radix Glycyrrhiza	Isoviolanthin	18.7893	0.81143
Radix Glycyrrhiza	isoglycyrol	44.0524	0.83845
Radix Glycyrrhiza	isolicoflavonol	45.17	0.41859
Radix Glycyrrhiza	isoglycycoumarin	22.0897	0.59688
Radix Glycyrrhiza	Isoliquiritin	81.0849	0.60054
Radix Glycyrrhiza	isoliquiritigenin	89.4746	0.14805
Radix Glycyrrhiza	Liquiritin apioside	29.2287	0.81991
Radix Glycyrrhiza	licuraside	5.25273	0.76788
Radix Glycyrrhiza	2-pentylfuran	51.7905	0.019337
Radix Glycyrrhiza	isograbrol	11.04	0.50412
Radix Glycyrrhiza	isoglabrolide	14.7662	0.6179
Radix Glycyrrhiza	Isoononin	38.3654	0.78899
Radix Glycyrrhiza	isoschaftoside	17.384	0.8255
Radix Glycyrrhiza	Isoquercitrin	35.7783	0.76905
Radix Glycyrrhiza	prunetin	72.517	0.23892
Radix Glycyrrhiza	6,8-diprenylorobol	1.21049	0.5904
Radix Glycyrrhiza	1-methoxyphaseollidin	69.981	0.63739
Radix Glycyrrhiza	22β-acetylglabric acid	17.7562	0.63905
Radix Glycyrrhiza	astragalin	41.5289	0.73616
Radix Glycyrrhiza	naringenin	38.9996	0.21142
Radix Glycyrrhiza	quercetin	34.5955	0.27524
Radix Glycyrrhiza	quercetin-3',3'-dimethyl ether	46.4494	0.3343
Radix Glycyrrhiza	Glycyrrhizin	8.67833	0.1105
Radix Glycyrrhiza	24-Hydroxy-11-deoxyglycyrrhetic acid	17.5744	0.76424
Radix Glycyrrhiza	24-Hydroxyglycyrrhetic acid	24.168	0.72374
Radix Glycyrrhiza	2'，4'-dihydroxy-chalcone	73.1796	0.1226
Radix Glycyrrhiza	2,6-Bis(1,1-dimethylethyl)-4-methyl phenol	40.3218	0.07198
Radix Glycyrrhiza	3'（γ，γ-dimethylallyl）-kievitone	1.21179	0.63427
Radix Glycyrrhiza	3'-Hydroxy-4'-O-Methylglabridin	43.715	0.57406
Radix Glycyrrhiza	3(R)-vestitol	68.9414	0.20928
Radix Glycyrrhiza	3,3-dimethylpentane	41.972	0.0091904
Radix Glycyrrhiza	3,4,3',4'-Tetrahydroxy-2-methoxychalcone	1.3258	0.20138
Radix Glycyrrhiza	7,4'-Dihydroxyflavone	19.0077	0.81144
Radix Glycyrrhiza	1-methyl-4-methyl ethyl benzene	27.1531	0.022462
Radix Glycyrrhiza	3-methylheptane	36.6134	0.0079801
Radix Glycyrrhiza	3-Methylhexane	38.1927	0.0058853
Radix Glycyrrhiza	3-methylpentane	35.7726	0.0041776
Radix Glycyrrhiza	3-ethylpentane	35.7388	0.0061965
Radix Glycyrrhiza	3-Hydroxyglabrol	4.72628	0.58286
Radix Glycyrrhiza	3'-Methoxyglabridin	46.1615	0.57393
Radix Glycyrrhiza	isophorone	45.5816	0.027181
Radix Glycyrrhiza	3β-formylglabrolide	16.364	0.54935
Radix Glycyrrhiza	3β-hydroxyolean-11,13(18)-dien-30-oic acid	17.572	0.76151
Radix Glycyrrhiza	4',7-Dimethoxyisoflavone	24.2851	0.23865
Radix Glycyrrhiza	Isoviolanthin	3.88735	0.86405
Radix Glycyrrhiza	1-methyoxyficifolinol	14.6107	0.86396
Radix Glycyrrhiza	4'-O-Methylglabridin	36.2143	0.52122
Radix Glycyrrhiza	4,2',4',alpha-Tetrahydroxydihydrochalcone	2.44723	0.16353
Radix Glycyrrhiza	7-hydroxy-4-(4-hydroxyphenyl)-6-(3-methylbut-2-en-1-yl)-2H-chromen-2-one	39.7091	0.32613
Radix Glycyrrhiza	4-hydroxylonchocarpin	5.19751	0.3417
Radix Glycyrrhiza	4H-Pyran-4-one，2，3-dihydro-3，5-dihydroxy-6-methyl	37.7998	0.029582
Radix Glycyrrhiza	5,6,7,8-Tetrahydro-4-methylquinoline	59.1793	0.040821
Radix Glycyrrhiza	5-O-methyllicoricidin	10.8246	0.65962
Radix Glycyrrhiza	5-Eicosenoic acid	30.7029	0.19725
Radix Glycyrrhiza	6″-O-acetylliquiritin	6.25766	0.81689
Radix Glycyrrhiza	Kanzonol F	32.4683	0.89364
Radix Glycyrrhiza	11-deoxyglycyrrhetic acid	16.2103	0.75911
Radix Glycyrrhiza	6,8-diglucosyl apigenin	16.0048	0.78087
Radix Glycyrrhiza	6,8-diprenylgenistein	1.01538	0.5424
Radix Glycyrrhiza	6-prenylated eriodictyol	39.2238	0.41259
Radix Glycyrrhiza	7，2'，4'-trihydroxy－5-methoxy-3－arylcoumarin	83.7144	0.27136
Radix Glycyrrhiza	7-methoxy-2-methylisoflavone	34.9615	0.19946
Radix Glycyrrhiza	7-Acetoxy-2-methylisoflavone	38.9233	0.26217
Radix Glycyrrhiza	7-hydroxy-2-methylisoflavone	25.7988	0.1775
Radix Glycyrrhiza	8-prenylated eriodictyol	53.7948	0.40383
Radix Glycyrrhiza	Kanzonol H	16.9227	0.80362
Radix Glycyrrhiza	12-methyltetradecanoate	17.3612	0.094173
Radix Glycyrrhiza	9-Eicosenoic acid	30.7029	0.19725
Radix Glycyrrhiza	Afromosin	63.9853	0.26871
Radix Glycyrrhiza	Araboglycyrrhizin	60.934	0.13543
Radix Glycyrrhiza	Araboglycyrrhizin_qt	16.862	0.31505
Radix Glycyrrhiza	Artonin E	11.3828	0.79616
Radix Glycyrrhiza	Benzene,1-methoxy-4-(1-propenyl)	32.7854	0.027818
Radix Glycyrrhiza	Calycosin	35.5402	0.24277
Radix Glycyrrhiza	Gancaonin G	60.4352	0.39404
Radix Glycyrrhiza	Gancaonin H	50.1037	0.78416
Radix Glycyrrhiza	Licoagrocarpin	58.8139	0.58498
Radix Glycyrrhiza	18α-glycyrrhetic acid	17.4105	0.74293
Radix Glycyrrhiza	Gancaonin I	21.0771	0.3875
Radix Glycyrrhiza	Glyasperin A	2.46021	0.63256
Radix Glycyrrhiza	Glyasperins K	10.1496	0.44487
Radix Glycyrrhiza	Glyasperins M	72.6708	0.59274
Radix Glycyrrhiza	Glycyrrhiza flavonol A	41.2753	0.59512
Radix Glycyrrhiza	Hispaglabridin B	24.0547	0.88235
Radix Glycyrrhiza	Isobavachalcone	1.04109	0.26622
Radix Glycyrrhiza	Kanzonol E	5.77375	0.71249
Radix Glycyrrhiza	Kanzonol Z	21.7726	0.76169
Radix Glycyrrhiza	Licoagroisoflavone	57.2822	0.48679
Radix Glycyrrhiza	Licorice glycoside A	5.9454	0.35105
Radix Glycyrrhiza	18α-hydroxyglycyrrhetic acid	41.1614	0.7091
Radix Glycyrrhiza	Licorisoflavan A	3.68293	0.6598
Radix Glycyrrhiza	Morusin	10.5799	0.75643
Radix Glycyrrhiza	Odoratin	51.9206	0.18884
Radix Glycyrrhiza	Phaseol	57.044	0.57868
Radix Glycyrrhiza	Xambioona	54.8492	0.87419
Radix Glycyrrhiza	abssinone	26.7498	0.33426
Radix Glycyrrhiza	alpha-Terpineol	49.0241	0.03077
Radix Glycyrrhiza	beta-Terpinene	43.8945	0.022291
Radix Glycyrrhiza	dehydroglyasperins C	53.8233	0.37006
Radix Glycyrrhiza	dimethyl phthalate	57.3971	0.055942
Note：This table covers qi-enriching TCM name， compounds name in each TCM and their value of Oral Bioavailability and Drug-likeness.
